# Supplementary material for: A lipid atlas of human and mouse immune cells provides insights into ferroptosis susceptibility
Source: Research Square preprint supplement (doi:10.21203/rs.3.rs-2689702/v1), 2023-03-17
Supplement: Supplementary file 1 [file e23937df0200db3569929634.pdf]

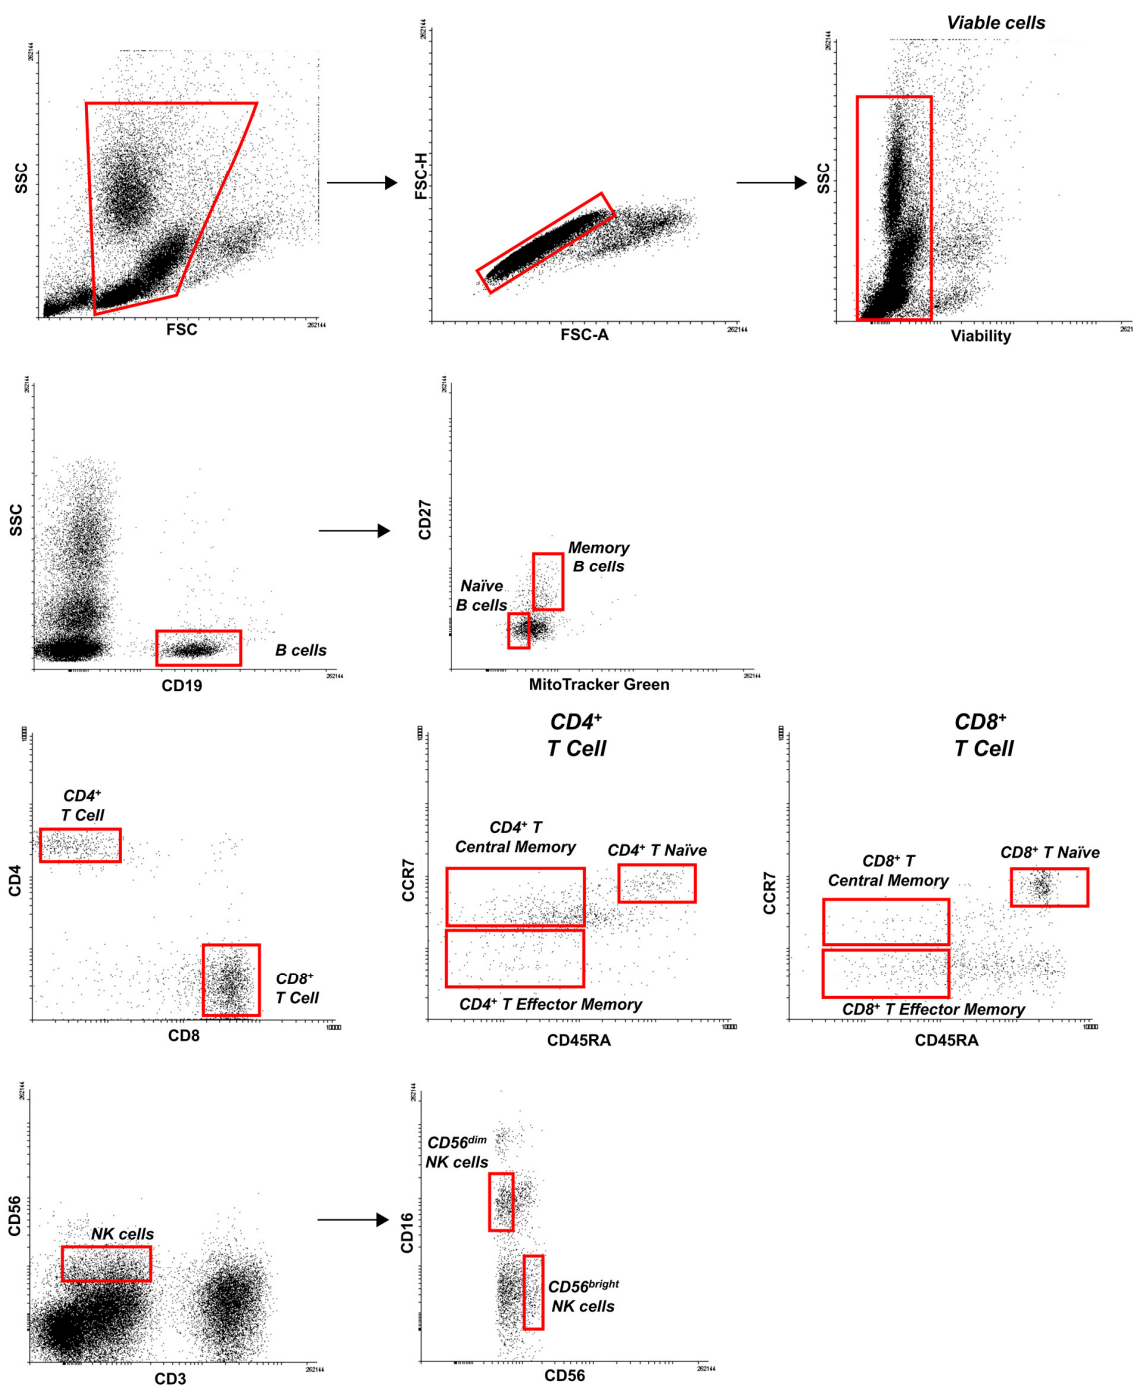

Gating strategies for the isolation of human lymphoid cells used in the lipid atlas section

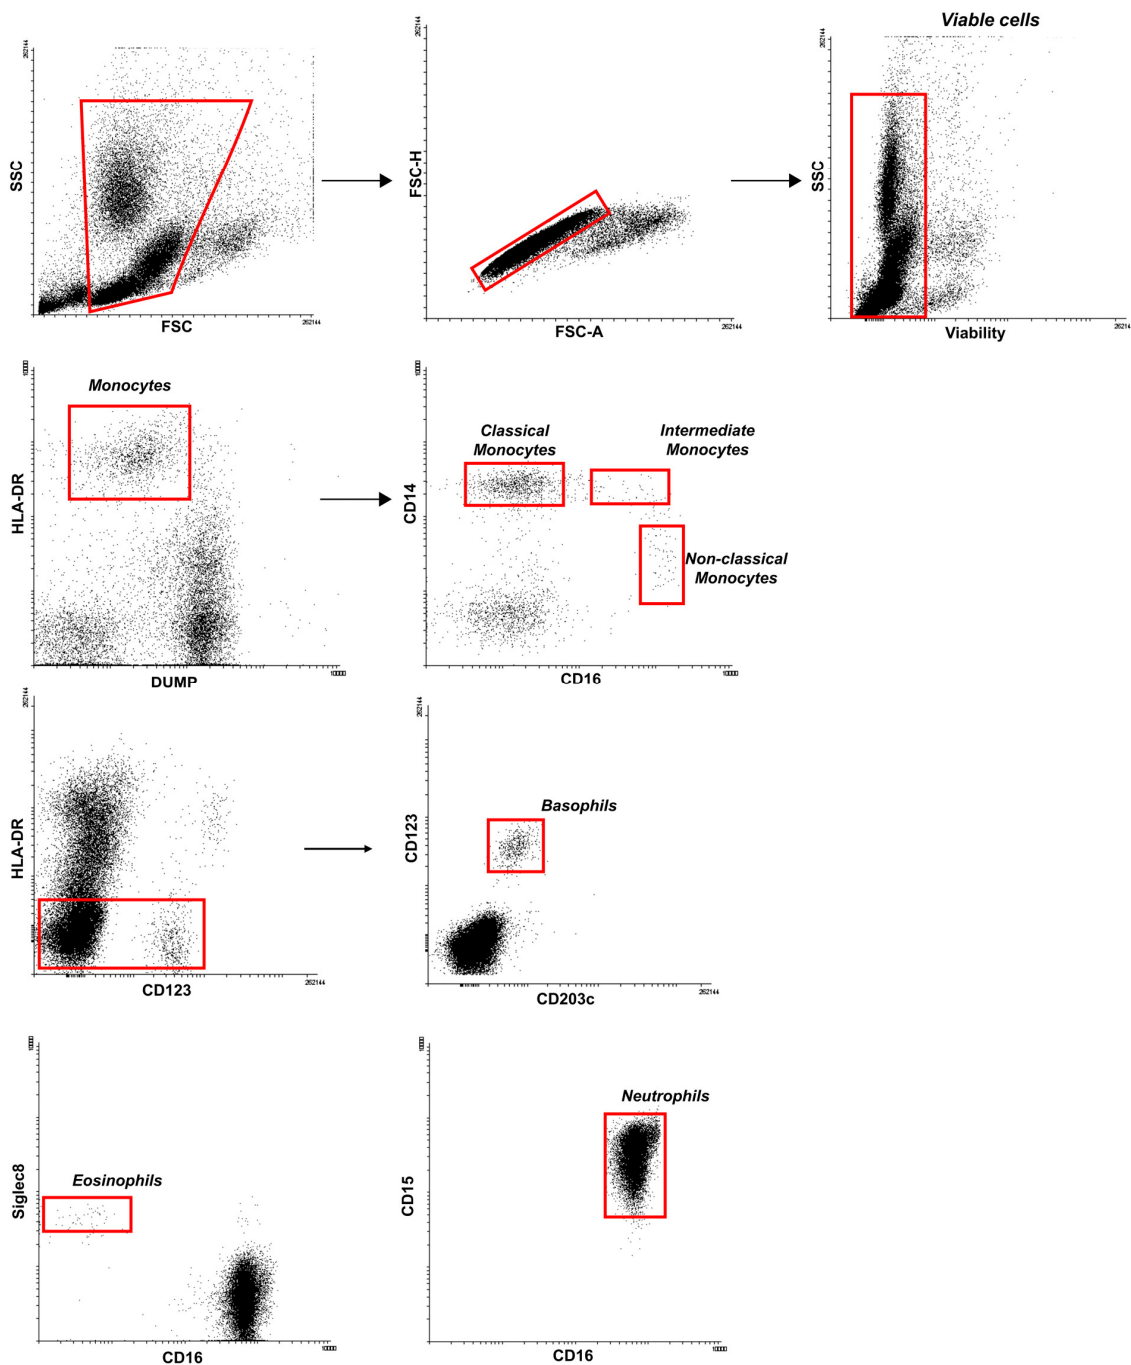

Gating strategies for the isolation of human myeloid cells used in the lipid atlas section

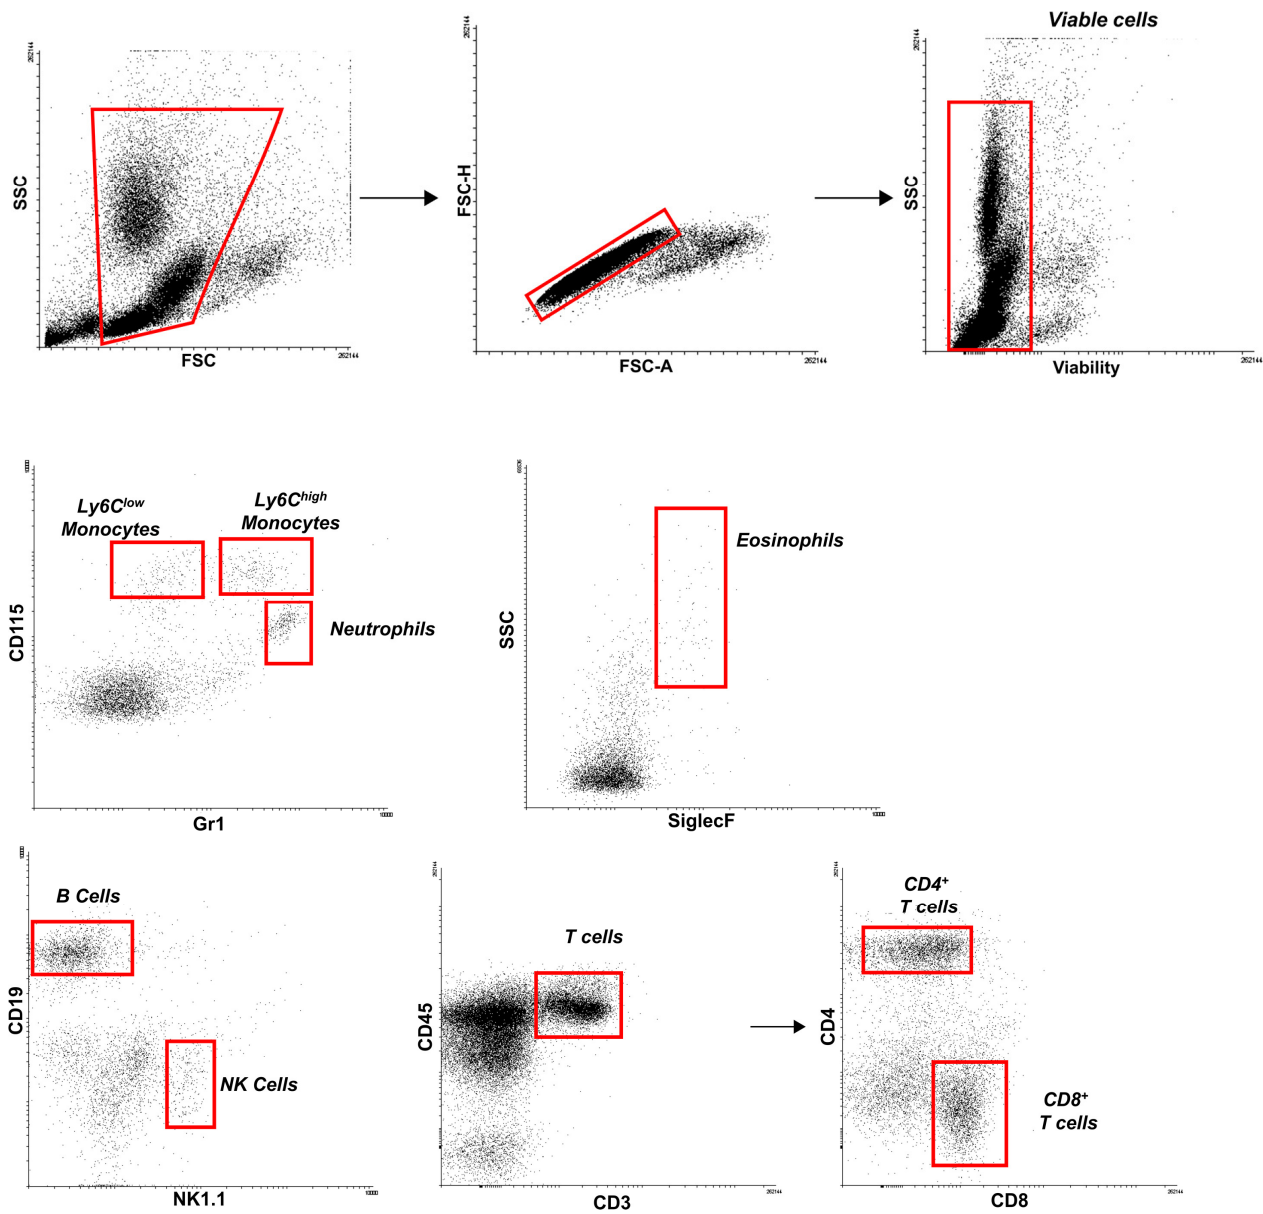

Gating strategies for the isolation of murine immune cells used in the lipid atlas section

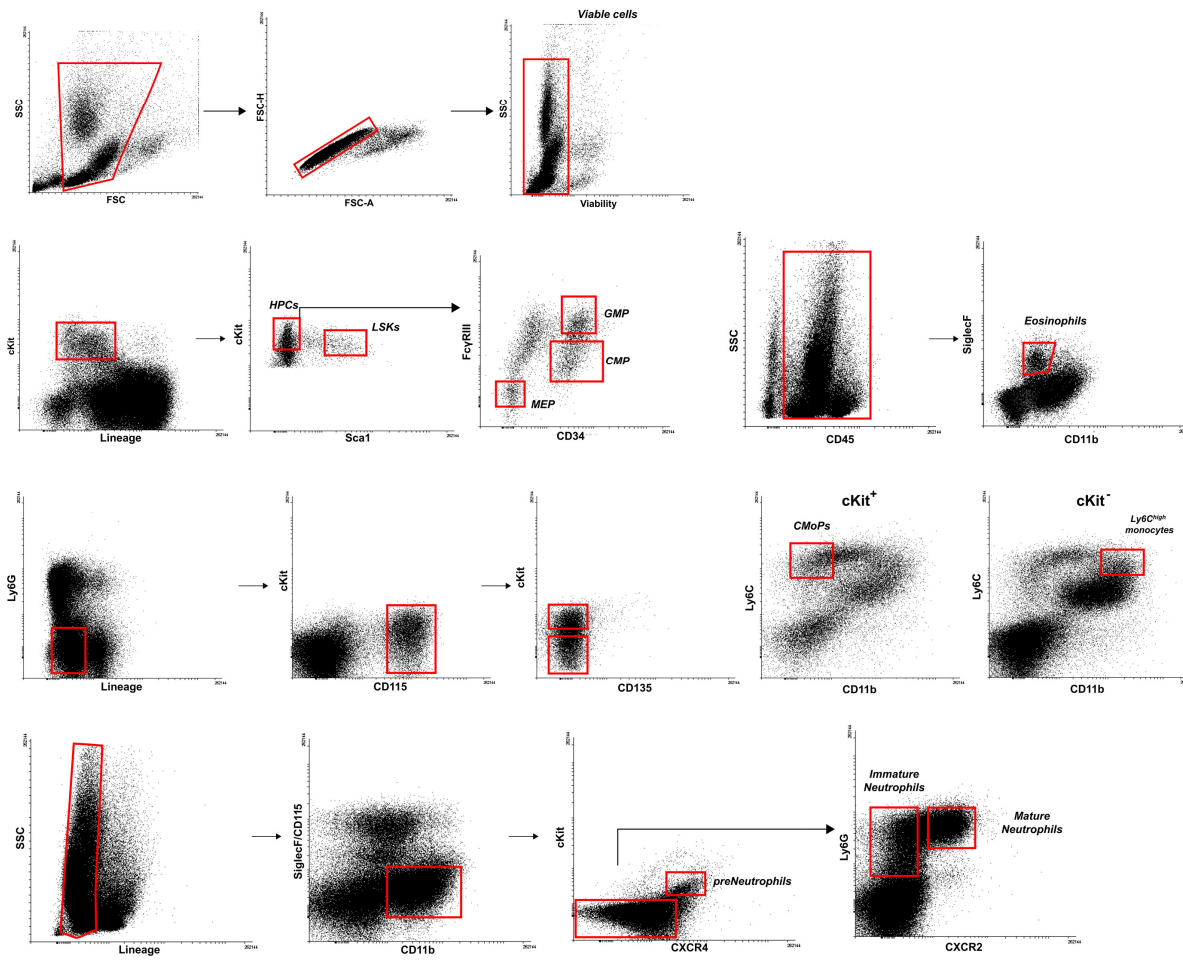

Gating strategies for the isolation of bone marrow haematopoietic cells used in the lipid atlas section

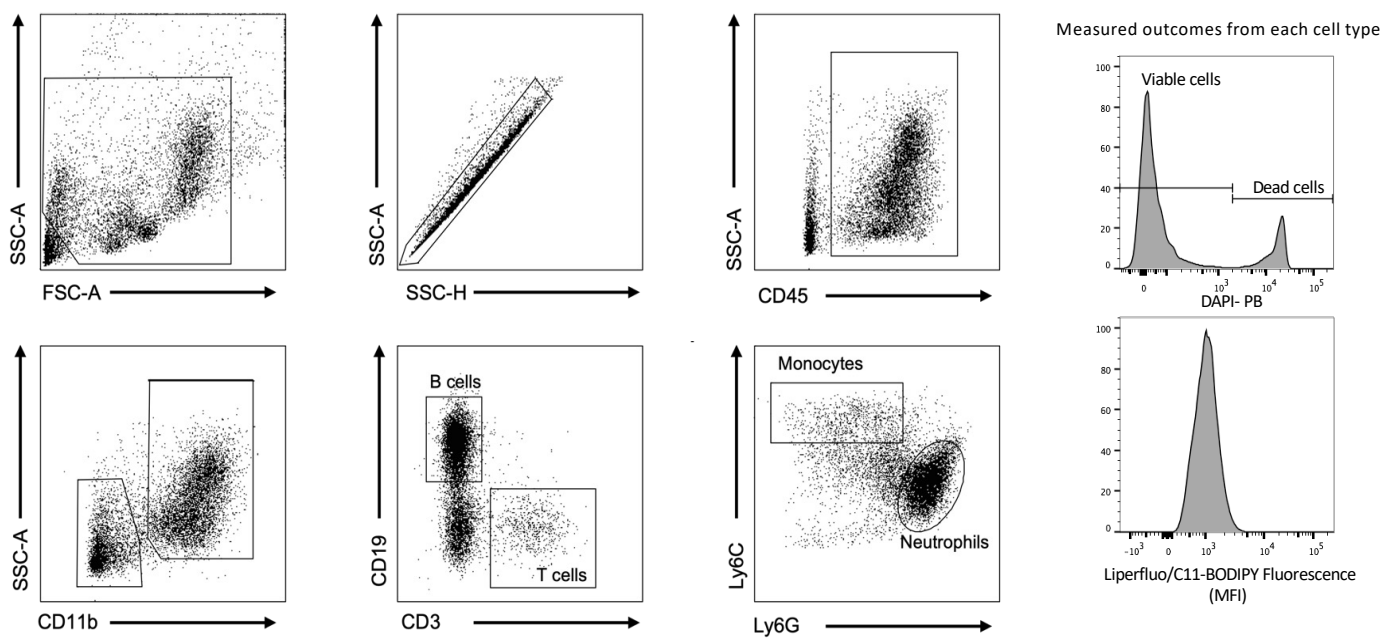

Gating strategy for human immune cells used in ferroptosis studies.

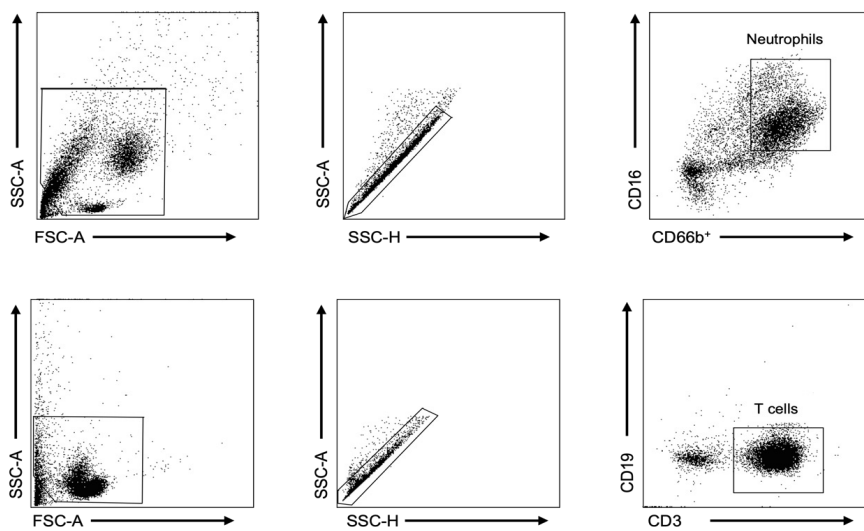

Measured outcomes from each cell type

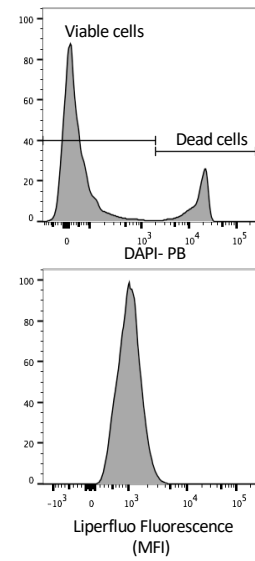

Gating strategy for mouse immune cells used in ferroptosis studies.
